# Supplementary material
Source: PubMed Central journal article supplement (PMC2901691)
Supplement: supp_192_12_3078__1.pdf [file supp_192_12_3078__1.pdf]

Accession: CP001582

Length: 1,588,278 bp

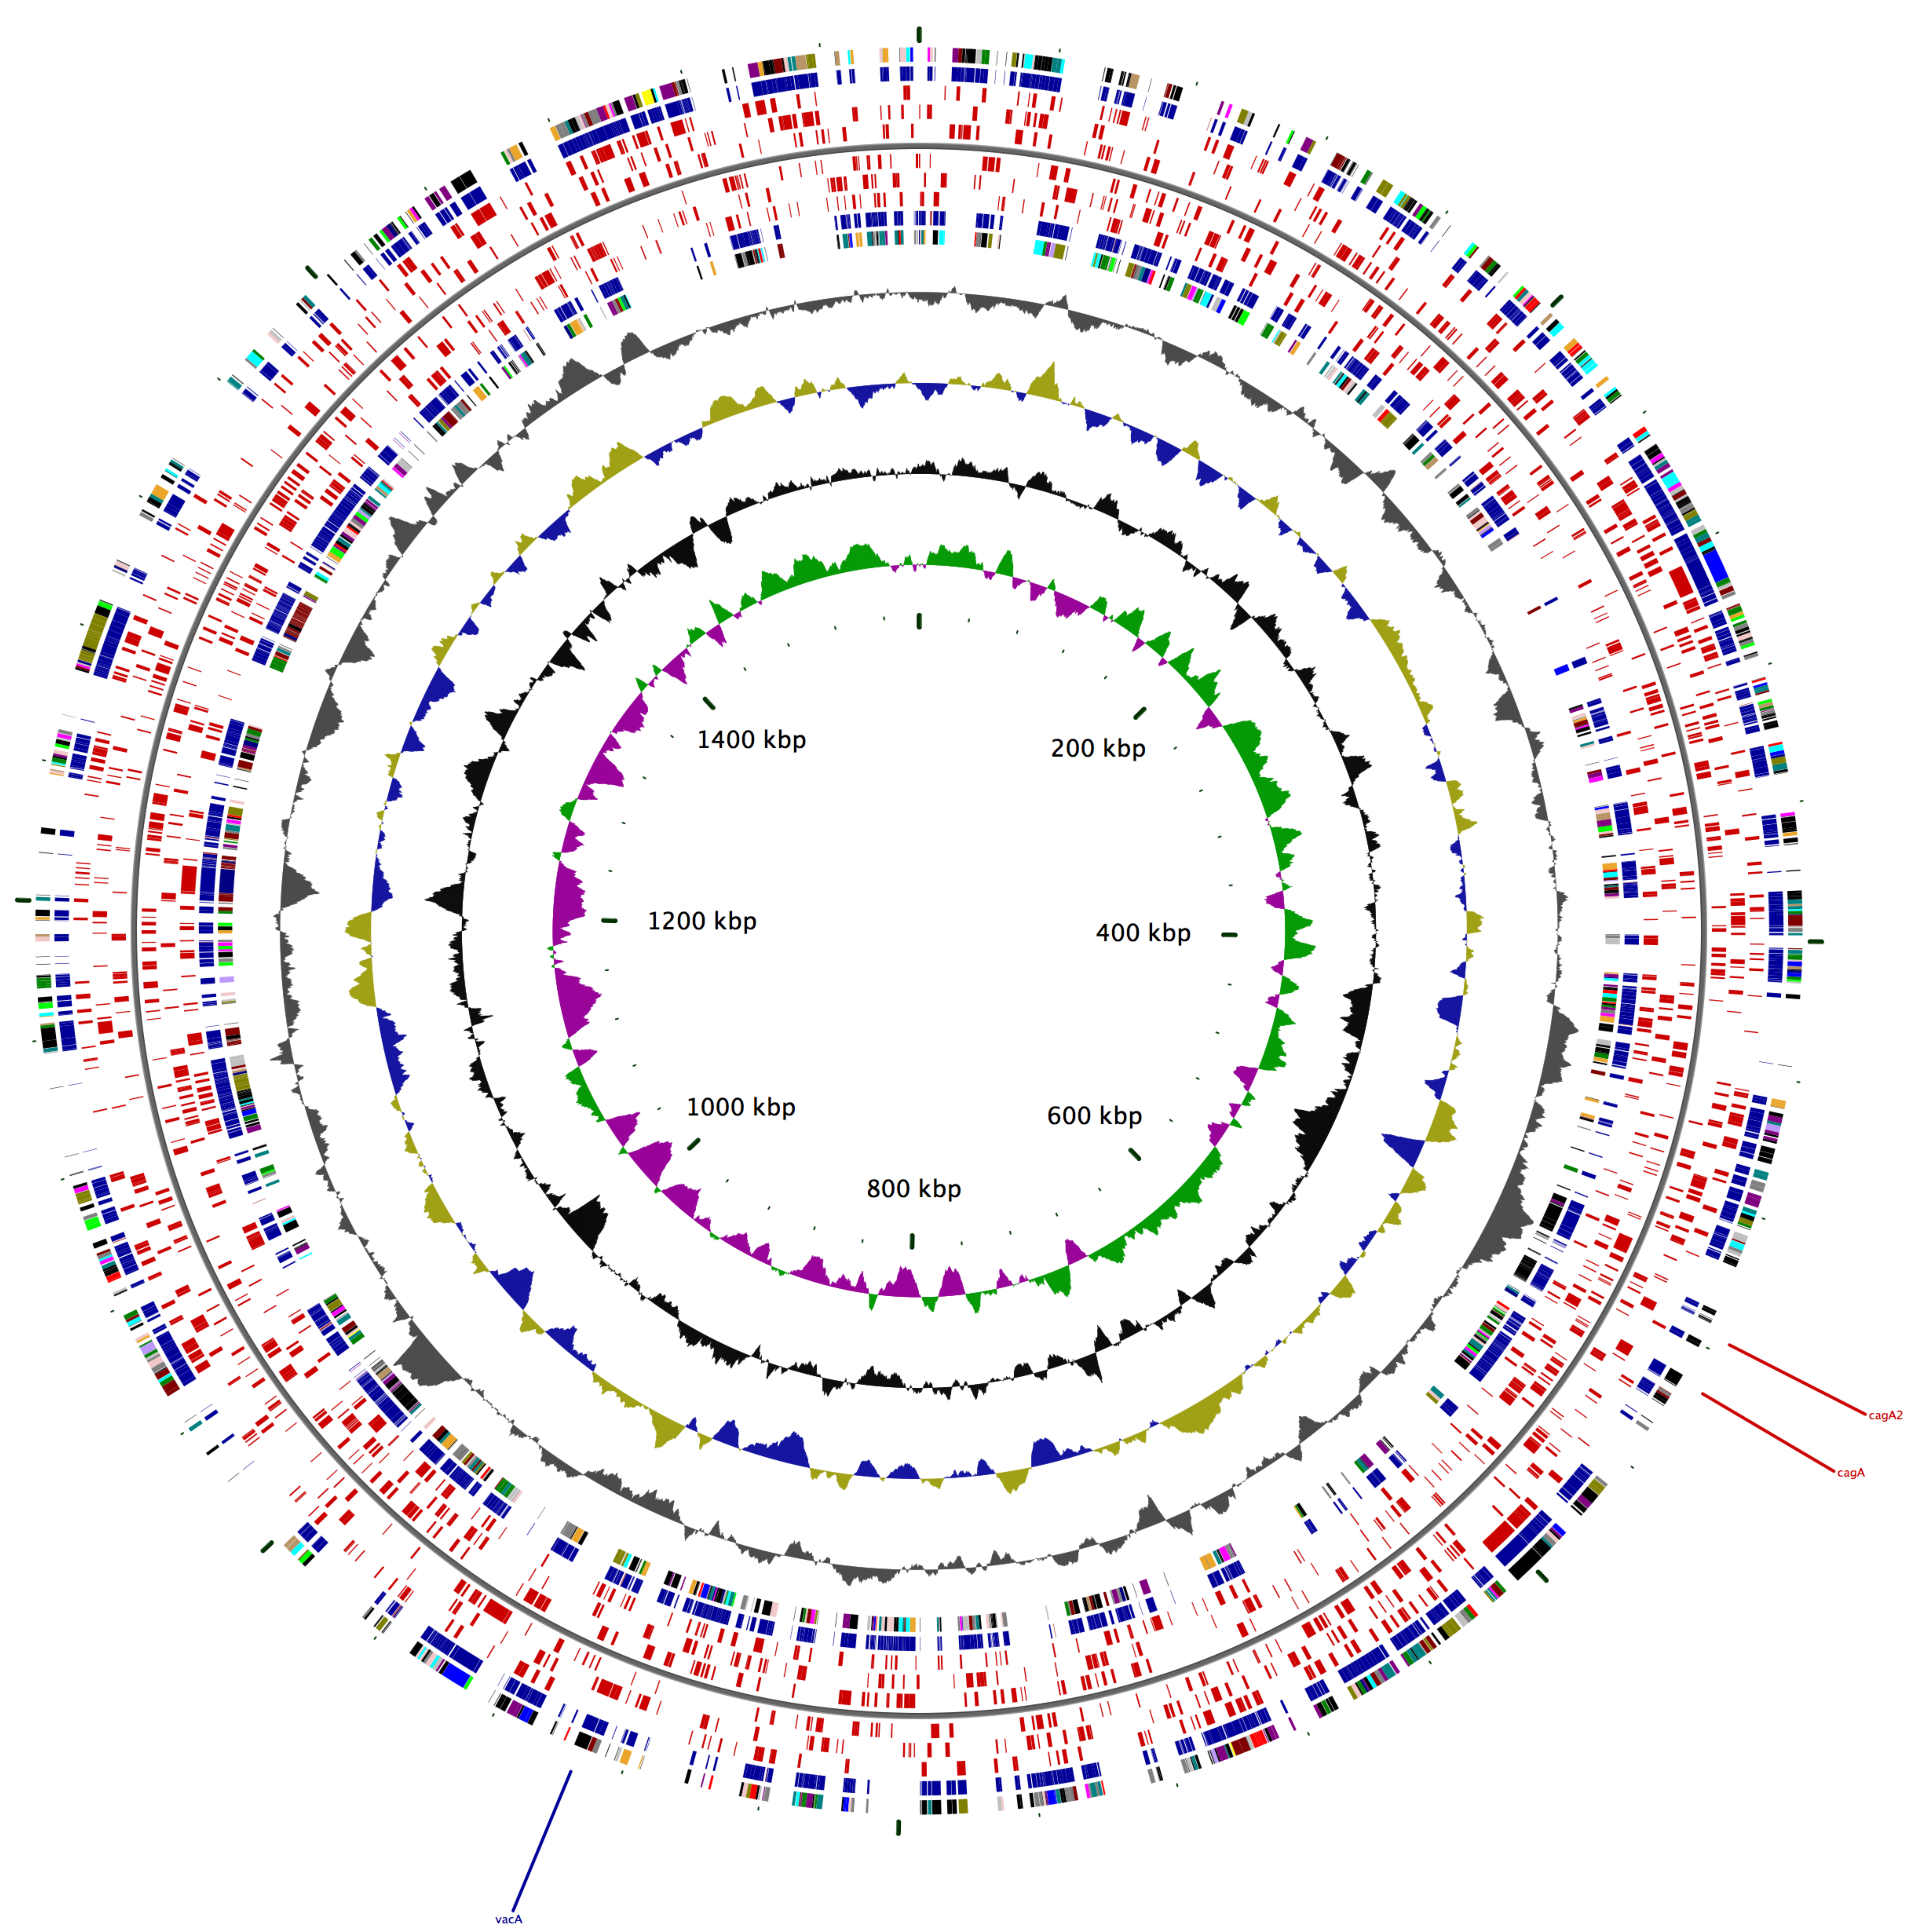

- C COG
- D COG
- E COG
- F COG
- G COG
- H COG
- I COG
- J COG
- K COG
- L COG
- M COG
- N COG
- O COG
- P COG
- Q COG
- R COG
- S COG
- T COG
- Unknown COG
- CDS
- tRNA
- rRNA
- ORF
- AT content
- AT skew+
- AT skew-
- GC content
- GC skew+
- GC skew-

*Helicobacter pylori* strain V225d

Accession: CP001583

Length: 7,326 bp

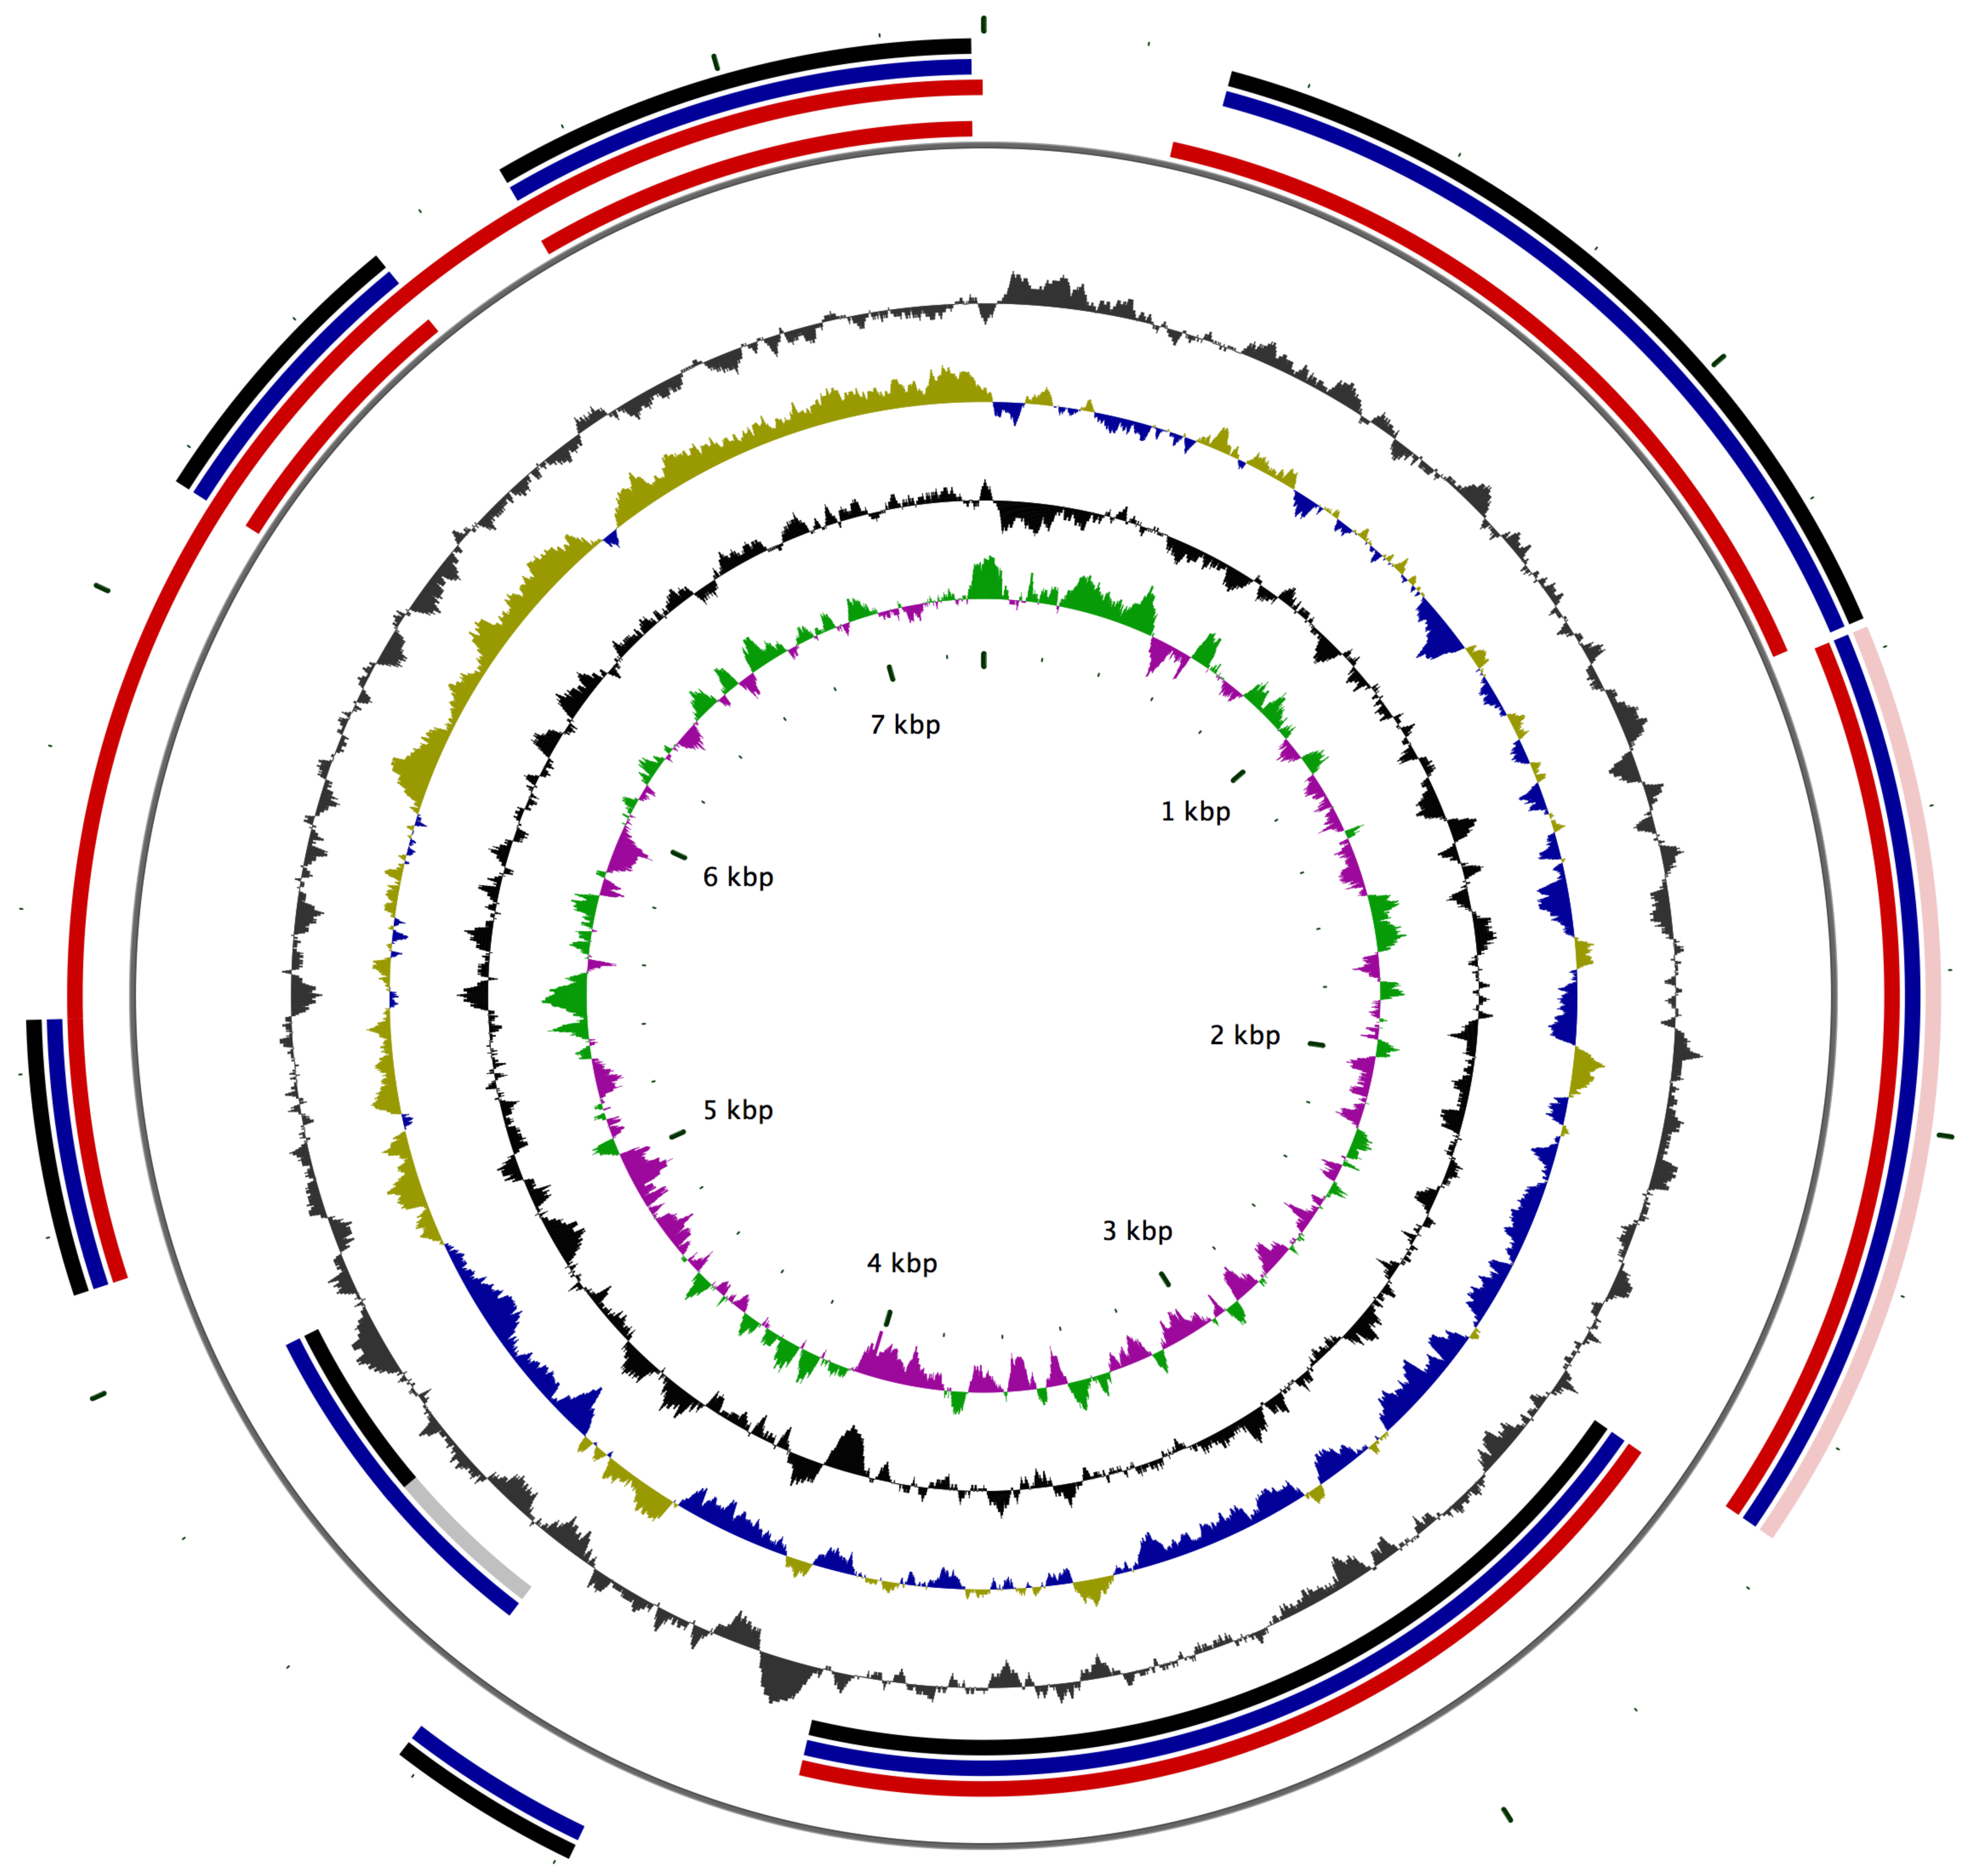

- C COG
- D COG
- E COG
- F COG
- G COG
- H COG
- I COG
- J COG
- K COG
- L COG
- M COG
- N COG
- O COG
- P COG
- Q COG
- R COG
- S COG
- T COG
- Unknown COG
- CDS
- tRNA
- rRNA
- ORF
- AT content
- AT skew+
- AT skew-
- GC content
- GC skew+
- GC skew-

Helicobacter pylori strain V225d plasmid
