# Supplementary material
Source: PubMed Central journal article supplement (PMC2901691)
Supplement: supp_192_12_3078__2.pdf [file supp_192_12_3078__2.pdf]

CLUSTAL W (1.81) multiple sequence alignment

```

95-54.(J128)_AAC25911      -----MEIQQTHRKINRPLVSLALVGLVSI-----TP----QQSHAAFFTTVIIP
AFN1156_AAK56856          -----MEIQQTHRKINRPIISLALVGLMGTELGANTPNDPHSESRAFFMTVIIP
CHN3295b_AAF26501         -----MEIQQTHRKINRPLVSLALVGLLVS-----TP----QKSHAAFFTTVIIP
CHN5114a_AAF26509        -----MEIQQTHRKINRPLVSLALVGLVSI-----TP----QQSHAAFFTTVIIP
CHN1811a_AAF26508        -----MEIQQTHRKINRPLVSLALVGLVSI-----TP----QQSHAAFFTTVIIP
CHN5147c_AAF26502        -----MEIQQTHRKINRPLVSLALVGLVSI-----TP----QQSHAAFFTTVIIP
Tx30a_AAA86834           -----MEIQQTHRKINRPIISLALVGLMGTELGANTPNDPHSESRAFFTTVIIP
OK129_BAD51782           -----MEIQQTHRKINRPLVSLALVGLLVS-----TP----QKSHAAFFTTVIIP
OK210_BAD51798           -----MEIQQTHRKINRPLVCLALVGLVSI-----TP----QKSHAAFFTTVIIP
OK155_BAD51786           -----MEIQQTHRKINRPIISLALVGLIGTELGANTPNDPHSESRAFFTTVIIP
OK130_BAD51783           -----MEIQQTHRKINRPLVSLALVGLLVS-----TP----QKSHAAFFTTVIIP
OK204_BAD51796           -----MEIQQTHRKINRPLVSLALVGLVSI-----TP----QQSHAAFFTTVIIP
OK179_BAD51790           -----MEIQQTHRKINRPLVSLALVGLVSI-----TP----QQSHAAFFTTVIIP
OK187_BAD51794           -----MEIQQTHRKINRPLVSLALVGLLVS-----TP----QQSHAAFFTTVIIP
OK180_BAD51791           -----MEIQQTHRKINRPLVSLALVGLLVS-----TP----QKSHAAFFTTVIIP
OK181_BAD51792           -----MEIQQTHRKINRPLVSLALVGLLVS-----TP----QKSHAAFFTTVIIP
OK185_BAD51793           -----MEIQQTHRKINRPLVSLALVGLVSI-----TP----QQSHAAFFTTVIIP
OK107_BAD51778           -----MEIQQTHRKINRPLVSLALVGLVSI-----TP----QQSHAAFFTTVIIP
OK205_BAD51797           -----MEIQQTHRKINRPLVSLALVGLVSI-----TP----QQSHAAFFTTVIIP
OK139_BAD51784           -----MEIQQTHRKINRPLVSLALVGLVSI-----TP----QQSHAAFFTTVIIP
OK160_BAD51789           -----MEIQQTHRKINRPLVSLALVGLVSI-----TP----QQSHAAFFTTVIIP
OK144_BAD51785           -----MEIQQTHRKINRPLVSLALVGLVSI-----TP----QQSHAAFFTTVIIP
Shi470_ACD48370         -----MEIQQTHRKINRPLVSLVLAGALISA-----IP----QESHAFFTTVIIP
V225                     -----MEIQQTHRKINRPLVSLALVGLLVS-----TP----QKSHAAFFTTVIIP
ch2_AAF86763             -----MEIQQTHRKINRPLVSLALVGLLVS-----TP----QKSHAAFFTTVIIP
OK109_BAD51779           -----MEIQQTHRKINRPLVSLALVGLVSI-----TP----QQSHAAFFTTVIIP
F36_AAD04277             -----MEIQQTHRKINRPLVSLALVGLLVS-----TP----QKSHAAFFTTVIIP
OK118_BAD51781           -----MEIQQTHRKINRPLVSLALVGLVSI-----TP----QQSHAAFFTTVIIP
F44_AAD04266             -----MEIQQTHHKINRPLVSLALVGLLVS-----TP----QKSHAAFFTTVIIP
F55_AAD04270             -----MEIQQTHRKINRPLVSLALVGLLVS-----TP----QKSHAAFFTTVIIP
OK194_BAD51795           -----MEIQQTHRKINRPLVSLALVGLVSI-----TP----QQSHAAFFTTVIIP
F70_AAD04286             -----MEIQQTHRKINRPLVSLALVGLLVS-----TP----QKSHAAFFTTVIIP
F56_AAD04271             -----MEIQQTHRKINRPLVSLALVGLVSI-----TP----QQSHAAFFTTVIIP
F78_AAD04275             -----MEIQQTHRKINRPLVSLALVGLLVS-----TP----QQSHAAFFTTVIIP
98-10_EEC22320          -----MEIQQTHRKINRPLVSLALVGLLVS-----TP----QKSHAAFFTTVIIP
F43_AAD04280             MELQQERKMEIQQTHRKINRPLVSLALVGLLVS-----TP----QKSHAAFFTTVIIP
F71_AAC77451             -----MEIQQTHRKINRPLVSLALVGLLVS-----TP----QKSHAAFFTTVIIP
F47_AAD04268             -----MEIQQTHRKINRPLVSLALVGLLVS-----TP----QKSHAAFFTTVIIP
F17_BAD51771             -----MEIQQTHRKINRPLVSLALVGLLVS-----TP----QKSHAAFFTTVIIP
F61_AAD04281             -----MEIQQTHRKINRPLVSLALVGLLVS-----TP----QKSHAAFFTTVIIP
F68_AAD04283             -----MEIQQTHRKINRPLVSLALVGLLVS-----TP----QKSHAAFFTTVIIP
F18_BAD51772             -----MEIQQTHRKINRPLVSLALVGLLVS-----TP----QKSHAAFFTTVIIP
F26_BAD51773             -----MEIQQTHRKINRPLVSLALVGLLVS-----TP----QQSHAAFFTTVIIP
OK158_BAD51787           -----MEIQQTHRKINRPLVSLALVGLVSI-----TP----QQSHAAFFTTVIIP
CHN5038c_AAL83505        -----MEIQQTHRKINRPLVSLALVGLLVS-----TP----QKSHAAFFTTVIIP
CHN3554a_AAL83503        -----MEIQQTHRKINRPLVSLALVGLLVS-----TP----QKSHAAFFTTVIIP
CHN4611a_AAL83504        -----MEIQQTHRKINRPLVSLALVGLLVS-----TP----QKSHAAFFTTVIIP
F73_AAD04289             -----MESQQTHRKINRPLVSLALVGLVSI-----TP----QQSHAAFFTTVIIP
F65_AAD04272             -----MEIQQTHRKINRPLVSLALVGLLVS-----TP----QKSHAAFFTTVIIP
F45_AAD04267             -----MEIQQTHRKINRPLVSLALVGLLVS-----TP----QKSHAAFFTTVIIP
F21_AAD04261             -----MEIQQTHRKINRPLVSLALVGLLVS-----TP----QKSHAAFFTTVIIP
OK159_BAD51788           -----MEIQQTHRKINRPLVSLALVGLVSI-----TP----QQSHAAFFTTVIIP
OK101_BAD51777           -----MEIQQTHRKINRPLVSLALVGLLVS-----TP----QKSHAAFFTTVIIP
F72_AAD04288             -----MEIQQTHRKINRPLVSLALVGLLVS-----TP----QKSHAAFFTTVIIP
F16_BAD51770             -----MEIQQTHRKINRPLVSLALVGLLVS-----TP----QKSHAAFFTTVIIP
CHN5060d_AAF26510       -----MEIQQTHRKINRPLVSLALVGLLVS-----TP----QKSHAAFFTTVIIP
F15_BAD51769             -----MEIQQTHRKINRPLVSLALVGLLVS-----TP----QKSHAAFFTTVIIP
F33_AAD04276             -----MEIQQTHRKINRPLVSLALVGLLVS-----TP----QKSHAAFFTTVIIP
F38_AAD04279             -----MEIQQTHRKINRPLVSLALVGLLVS-----TP----QKSHAAFFTTVIIP
F42_AAD04265             -----MEIQQTHRKINRPLVSLALVGLLVS-----TP----QKSHAAFFTTVIIP
F13_BAD51768             -----MEIQQTHRKINRPLVSLALVGLLVS-----TP----QKSHAAFFTTVIIP
F64_AAD04282             -----MEIQQTHRKINRPLVSLALVGLLVS-----TP----QKSHAAFFTTVIIP
F69_AAD04285             -----MEIQQTHRKINRPLVSLALVGLLVS-----TP----QKSHAAFFTTVIIP
F35_AAD04264             -----MEIQQTHRKINRPLVSLALVGLLVS-----TP----QKSHAAFFTTVIIP

```

F52\_AAD04269 -----MELQOTHRKINRPLVSLALVGLLVS-----TP----QKSHAAFFTTVIIP  
F32\_BAD51774 -----MELQOTHRKINRPLVSLALVGLLVS-----TP----QKSHAAFFTTVIIP  
F80\_BAD51775 -----MEIQOTHRKMNRPLVSLVLAGALISA-----IP----QESHAFFTTVIIP  
F92\_BAD51776 -----MEIQOTHRKMNRPLVSLVLAGALISA-----IP----QESHAFFTTVIIP  
185-44\_CAA81528 -----MEIQOTHRKINRPLVSLALVGLVSI-----TP----QQSHAAFFTTVIIP  
AFN4847\_AAK56859 -----MEIQOTHRKMNRPLVSLVLAGALISA-----IP----QESHAFFTTVIIP  
J99\_AAD06400 -----MEIQOTHRKINRPLVSLVLAGALISA-----IP----QESHAFFTTVIIP  
AFN4124\_AAK56857 -----MEIQOTHRKMNRPLVSLVLAGALVSA-----IP----QESHAFFTTVIIP  
AFN4769\_AAK56858 -----MEIQOTHRKMNRPLVSLVLAGALISA-----IP----QESHAFFTTVIIP  
AFNG114\_AAK56860 -----MEIQOTHRKMNRPLVSLVLAGALVSA-----IP----QESHAFFTTVIIP  
AAB30582 -----MEIQOTHRKINRPLVSLALVGLVSI-----TP----QQSHAAFFTTVIIP  
DSM.4867./CCUG.17874./NCTC.116 -----MEIQOTHRKINRPLVSLALVGLVSI-----TP----QQSHAAFFTTVIIP  
NCTC.11638\_AAA18867 -----MEIQOTHRKINRPLVSLALVGLVSI-----TP----QQSHAAFFTTVIIP  
HPAG1\_ABF84934 -----MEIQOTHRKMNRPLVSLVLAGALISA-----IP----QQSHAAFFTTVIIP  
P12\_ACJ08036 -----MEIQOTHRKINRPLVSLALVGLVSI-----TP----QQSHAAFFTTVIIP  
F79\_AAC77452 -----MEIQOTHRKINRPLVSLALVGLVSI-----TP----QQSHAAFFTTVIIP  
26695\_AAD07935 -----MEIQOTHRKINRPLVSLALVGLVSI-----TP----QQSHAAFFTTVIIP  
ATCC.700392./.26695\_P55981 -----MEIQOTHRKINRPLVSLALVGLVSI-----TP----QQSHAAFFTTVIIP  
ATCC.43526\_AAB53868 -----MEIQOTHRKINRPLVSLALVGLVSI-----TP----QQSHAAFFTTVIIP  
NCTC.11637\_AAD04290 -----MEIQOTHRKINRPLVSLALVGLVSI-----TP----QQSHAAFFTTVIIP  
60190.(ATCC.49503)\_AAA17657 -----MEIQOTHRKINRPLVSLALVGLVSI-----TP----QQSHAAFFTTVIIP  
ATCC.49503./.60190\_Q48245 -----MEIQOTHRKINRPLVSLALVGLVSI-----TP----QQSHAAFFTTVIIP  
F37\_AAC77450 -----MEIQOTHRKINRPLVSLALVGLVSI-----TP----QQSHAAFFTTVIIP  
G27\_ACI27595 -----MEIQOTHRKMNRPLVSLVLAGALISA-----IP----QESHAFFTTVIIP

\*\* \*.\*:\*\*\*:~.~.~.~.~ \* \* \* \* \*

95-54.(J128)\_AAC25911 AIVGGIATGAAVGTVSGLLSWGLKQAEANKTPDKPKDVWRIQAGRG--FNNFPNKEYDL  
AFN1156\_AAK56856 AIVGGIATGTAVGTVSGLLWGLKQAEQANKTPDKPKDVWRIQAGRGRGFNNFPNKQYDL  
CHN3295b\_AAF26501 AIVGGIASGAAVGTVSGLLGWGLKQAEANKTPDKPKDVWRIQA-ES--FNEFPNKEYDL  
CHN5114a\_AAF26509 AIVGGIATGAAVGTVSGLLGWGLKQAEANKTPDKPKDVWCIQAGRG--FNEFPNKEYDL  
CHN1811a\_AAF26508 AIVGGIATGAAVGTVSGLLGWGLKQAEANKTPDKPKDVWCIQAGRG--FNEFPNKEYDL  
CHN5147c\_AAF26502 AIVGGIATGAAVGTVSGLLGWGLKQAEANKTPDKPKDVWCIQAGRG--FNEFPNKEYDL  
Tx30a\_AAA86834 AIVGGIATGAAVGTVSGLLSWGLKQAEQANKAPDKPKDVWRIQAGRG--FDNFPNKEYDL  
OK129\_BAD51782 AIVGGIATGAAVGTVSGLLSWGLKQAEANKTPDKPKDVWRIQAGRG--FNEFPNKEYDL  
OK210\_BAD51798 AIVGGIATGAAVGTVSGLLGWGLKQAEANKTPDKPKDVWRIQAGRG--FNEFPNKEYDL  
OK155\_BAD51786 AIVGGIATGTAVGTVSGLLSWGLKQAEQANKTPDKPKDVWRIQAGRG--FNNFPNKQYDL  
OK130\_BAD51783 AIVGGIATGAAVGTVSGLLSWGLKQAEANKTPDKPKDVWRIQAGRG--FNNFPNKEYDL  
OK204\_BAD51796 AIVGGIATGAAVGTVSGLLSWGLKQAEANKTPDKPKDVWRIQAGRG--FNNFPNKEYDL  
OK179\_BAD51790 AIVGGIATGAAVGTVSGLLSWGLKQAEANKTPDKPKDVWRIQAGRG--FNDNFPNKQYDL  
OK187\_BAD51794 AIVGGIATGAAVGTVSGLLSWGLKQAEANKTPDKPKDVWRIQAGRG--FNNFPNKQYDL  
OK180\_BAD51791 AIVGGIATGAAVGTVSGLLGWGLKQAEANKTPDKPKDVWRIQAGRG--FNNFPNKEYDL  
OK181\_BAD51792 AIVGGIATGAAVGTVSGLLSWGLKQAEANKTPDKPKDVWRIQAGRG--FNEFPNKEYDL  
OK185\_BAD51793 AIVGGIATGAAVGTVSGLLSWGLKQAEANKTPDKPKDVWHIQAGRG--FNNFPNKEYDL  
OK107\_BAD51778 AIVGGIATGAAVGTVSGLLSWGLKQAEQANKTPDKPKDVWRIQAGRG--FNNFPNKQYDL  
OK205\_BAD51797 AIVGGIATGAAVGTVSGLLSWGLKQAEANKTPDKPKDVWRIQAGRG--FNNFPNKEYDL  
OK139\_BAD51784 AIVGGIATGAAVGTVSGLLSWGLKQAEANKTPDKPKDVWRIQAGRG--FNNFPNKEYDL  
OK160\_BAD51789 AIVGGIATGAAVGTVSGLLSWGLKQAEANKTPDKPKDVWRIQAGRG--FNNFPNKEYDL  
OK144\_BAD51785 AIVGGIATGAAVGTVSGLLSWGLKQAEANKTPDKPKDVWRIQAGRG--FNNFPNKEYDL  
Shi470\_ACD48370 AIVGGIATGTAVGTVSGLLSWGLKQAEANKTPDKPKDVWRIQAGRG--FNEFPNKEYDL  
V225 AIVGGIATGAAVGTVSGLLSWGLKQAEANKTPDKPKDVWRIQAGRG--FNEFPNKEYDL  
ch2\_AAF86763 AIVGGIASGAAVGTVSGLLGWGLKQAEANKTPDKPKDVWRIQAGRG--FNEFPNKEYDL  
OK109\_BAD51779 AIVGGIATGAAVGTVSGLLSWGLKQAEANKTPDKPKDVWRIQAGRG--FNEFPNKEYDL  
F36\_AAD04277 AIVGGIASGAAVGTVSGLLGWGLKQAEANKTPDKPKDVWRIQAGRG--FNEFPNKEYDL  
OK118\_BAD51781 AIVGGIATGAAVGTVSGLLSWGLKQAEANKTPDKPKDVWRIQAGRG--FNNFPNKEYDL  
F44\_AAD04266 AIVGGIASGAAVGTVSGLLGWGLKQAEANKTPDKPKDVWRIQAGRG--FNEFPNKEYDL  
F55\_AAD04270 AIVGGIATGAAVGTVSGFLAGGLKQAEANKTPDKPKDVWRIQAGRG--FNEFPNKEYDL  
OK194\_BAD51795 AIVGGIATGAAVGTVSGLLGWGLKQAEANKTPDKPKDVWRIQAGRG--FNEFPNKEYDL  
F70\_AAD04286 AIVGGIASGAAVGTVSGLLGWGLKQAEANKTPDKPKDVWRIQAGRG--FNEFPNKEYDL  
F56\_AAD04271 ASVGGIATGAAVGTVSGLLGWGLKQAEANKTPDKPKDVWRIQAGRG--FNEFPNKEYDL  
F78\_AAD04275 AIVGGIATGAAVGTVSGLLGWGLKQAEANKTPDKPKDVWRIQAGRG--FNEFPNKEYDL  
98-10\_EEC22320 AIVGGIATGAAVGTVSGLLGWGLKQAEANKTPDKPKDVWRIQAGRG--FNEFPNKEYDL  
F43\_AAD04280 AIVGGIATGAAVGTVSGLLGWGLKQAEANKTPDKPKDVWRIQAGRG--FNEFPNKEYDL  
F71\_AAC77451 AIVGGIASGAAVGTVSGLLGWGLKQAEANKTPDKPKDVWRIQAGRG--FNEFPNKEYDL  
F47\_AAD04268 AIVGGIATGAAVGTVSGLLGWGLKQAEANKTPDKPKDVWRIQAGRG--FNEFPNKEYDL  
F17\_BAD51771 AIVGGIATGAAVGTVSGLLGWGLKQAEANKTPDKPKDVWRIQAGRG--FNEFPNKEYDL  
F61\_AAD04281 AIVGGIATGAAVGTVSGLLGWGLKQAEANKTPDKPKDVWRIQAGRG--FNEFPNKEYDL  
F68\_AAD04283 AIVGGIATGAAVGTVSGLLGWGLKQAEANKTPDKPKDVWRIQAGRG--FNEFPNKEYDL





























OK179\_BAD51790 LVIDEIYHAPWNYFDARNVTDVEINKKILFGAPGYIAGKTGLM-FNNLTLNSNASMDY GK  
OK187\_BAD51794 LVIDELYHAPWNYFDARNITDVEINKKILFGAPGNIAGKTGLM-FNNLTLNSNASMDY GK  
OK180\_BAD51791 LVIDELYHAPWNYFDARNVTDVEINKKILFGAPGYIAGKTGLM-FNNLTLNSNASMDY GK  
OK181\_BAD51792 LVIDELYHAPWNYFDARNVTDVEINKKILFGAPGYIAGKTGLM-FNNLTLNSNASMDY GK  
OK185\_BAD51793 LVIDELYHAPWNYFDARNVTDVEINKKILFGAPGYIAGKTGLM-FNNLTLNSNASMDY GK  
OK107\_BAD51778 LVIDELYHAPWNYFDARNVTDVEINKKILFGAPGYIAGKTGLM-FNNLTLNSNASMDY GK  
OK205\_BAD51797 LVIDELYHAPWNYFDARNVTDVEINKKILFGAPGYIAGKTGLM-FNNLTLNSNASMDY GK  
OK139\_BAD51784 LVIDELYHAPWNYFDARNVTDVEINKKILFGAPGYIAGKTGLM-FNNLTLNSNASMDY GK  
OK160\_BAD51789 LVIDELYHAPWNYFDARNVTDVEINKKILFGAPGYIAGKTGLM-FNNLTLNSNASMDY GK  
OK144\_BAD51785 LVIDELYHAPWNYFDARNVTDVEINKKILFGAPGYIAGKTGLM-FNNLTLNSNASMDY GK  
Shi470\_ACD48370 LVINDFYYPWNYFDARNIKNVEITNKLAFGPQGS PWGTAKLM-FNNLTLGHNAMVDYSQ  
V225 LVINDFYYPWNYFDARNIKNVEITNKLAFGPQGS PWGTAKLM-FNNLTLGHNAMVDYSQ  
ch2\_AAF86763 LVINDFYYPWNYFDARNIKNVEITNKLAFGPQGS PWGTAKLM-FNNLTLGHNAMVDYSQ  
OK109\_BAD51779 LVINDFYYPWNYFDARNIKNVEITNKLAFGPQGS PWGTAKLM-FNNLTLGPNAMVDYSQ  
F36\_AAD04277 LVINDFYYPWNYFDARNIKNVEITNKLAFGPQGS PWGTAKLM-FNNLTLGPNAMVDYSQ  
OK118\_BAD51781 LVINDFYYPWNYFDARNIKNVEITNKLAFGPQGS PWGTAKLM-FNNLTLGPNAMVDYSQ  
F44\_AAD04266 LVINDFYYPWNYFDARNIKNVEITNKLAFGPQGS PWGTAKLM-FNNLTLGPNAMVDYSQ  
F55\_AAD04270 LVINDFYYPWNYFDARNIKNVEITNKLAFGPQGS PWGTAKLM-FNNLTLGPNAMVDYSQ  
OK194\_BAD51795 LVINDFYYPWNYFDARNIKNVEITNKLAFGPQGS PWGTAKLM-FNNLTLGPNAMVDYSQ  
F70\_AAD04286 LVINDFYYPWNYFDARNIKNVEITNKLAFGPQGS PWGTAKLM-FNNLTLGPNAMVDYSQ  
F56\_AAD04271 LVINDFYYPWNYFDARNIKNVEITNKLAFGPQGS PWGTAKLM-FNNLTLGPNAMVDYSQ  
F78\_AAD04275 LVINDFYYPWNYFDARNIKNVEITNKLAFGPQGS PWGTAKLM-FNNLTLGPNAMVDYSQ  
98-10\_EEC22320 LVINDFYYPWNYFDARNIKNVEITNKLAFGPQGS PWGTAKLM-FNNLTLGPNAMVDYSQ  
F43\_AAD04280 LVINDFYYPWNYFDARNIKNVEITNKLAFGPQGS PWGTAKLM-FNNLTLGPNAMVDYSQ  
F71\_AAC77451 LVINDFYYPWNYFDARNIKNVEITNKLAFGPQGS PWGTAKLM-FNNLTLAPNAVMDYSQ  
F47\_AAD04268 LVINDFYYPWNYFDARNIKNVEITNKLAFGPQGS PWGTAKLM-FNNLTLGPNAMVDYSQ  
F17\_BAD51771 LVINDFYYPWNYFDARNIKNVEITNKLAFGPQGS PWGTAKLM-FNNLTLGPNAMVDYSQ  
F61\_AAD04281 LVINDFYYPWNYFDARNIKNVEITNKLAFGPQGS PWGTAKLM-FNNLTLGPNAMVDYSQ  
F68\_AAD04283 LVINDFYYPWNYFDARNIKNVEITNKLAFGPQGS PWGTAKLM-FNNLTLGPNAMVDYSQ  
F18\_BAD51772 LVINDFYYPWNYFDARNIKNVEITNKLAFGPQGS PWGTAKLM-FNNLTLGPNAMVDYSQ  
F26\_BAD51773 LVINDFYYPWNYFDARNIKNVEITNKLAFGPQGS PWGTAKLM-FNNLTLGPNAMVDYSQ  
OK158\_BAD51787 LVINDFYYPWNYFDARNIKNVEITNKLAFGPQGS PWGTAKLM-FNNLTLGPNAMVDYSQ  
CHN5038c\_AAL83505 LVINDFYYPWNYFDARNIKNVEITNKLAFGPQGS PWGTAKLM-FNNLTLGPNAMVDYSQ  
CHN3554a\_AAL83503 LVINDFYYPWNYFDARNIKNVEITNKLAFGPQGS PWGTAKLM-FNNLTLGPNAMVDYSQ  
CHN4611a\_AAL83504 LVINDFYYPWNYFDARNIKNVEITNKLAFGPQGS PWGTAKLM-FNNLTLGPNAMVDYSQ  
F73\_AAD04289 LVINDFYYPWNYFDARNIKNVEITNKLAFGPQGS PWGTAKLM-FNNLTLGPNAMVDYSQ  
F65\_AAD04272 LVINDFYYPWNYFDARNIKNVEITNKLAFGPQGS PWGTAKLM-FNNLTLGPNAMVDYSQ  
F45\_AAD04267 LVINDFYYPWNYFDARNIKNVEITNKLAFGPQGS PWGTAKLM-FNNLTLGPNAMVDYSQ  
F21\_AAD04261 LVINDFYYPWNYFDARNIKNVEITNKLAFGPQGS PWGTAKLM-FNNLTLGPNAMVDYSQ  
OK159\_BAD51788 LVINDFYYPWNYFDARNIKNVEITNKLAFGPQGS PWGTAKLM-FNNLTLGPNAMVDYSQ  
OK101\_BAD51777 LVINDFYYPWNYFDARNIKNVEITNKLAFGPQGS PWGTAKLM-FNNLTLGPNAMVDYSQ  
F72\_AAD04288 LVINDFYYPWNYFDARNIKNVEITNKLAFGPQGS PWGTAKLM-FNNLTLGPNAMVDYSQ  
F16\_BAD51770 LVINDFYYPWNYFDARNIKNVEITNKLAFGPQGS PWGTAKLM-FNNLTLGPNAMVDYSQ  
CHN5060d\_AAF26510 LVINDFYYPWNYFDARNIKNVEITNKLAFGPQGS PWGTAKLM-FNNLTLGPNAMVDYSQ  
F15\_BAD51769 LVINDFYYPWNYFDARNIKNVEITNKLAFGPQGS PWGTAKLM-FNNLTLGPNAMVDYSQ  
F33\_AAD04276 LVINDFYYPWNYFDARNIKNVEITNKLAFGPQGS PWGTAKLM-FNNLTLGPNAMVDYSQ  
F38\_AAD04279 LVINDFYYPWNYFDARNIKNVEITNKLAFGPQGS PWGTAKLM-FNNLTLGPNAMVDYSQ  
F42\_AAD04265 LVINDFYYPWNYFDARNIKNVEITNKLAFGPQGS PWGTAKLM-FNNLTLGPNAMVDYSQ  
F13\_BAD51768 LVINDFYYPWNYFDARNIKNVEITNKLAFGPQGS PWGTAKLM-FNNLTLGPNAMVDYSQ  
F64\_AAD04282 LVINDFYYPWNYFDARNIKNVEITNKLAFGPQGS PWGTAKLM-FNNLTLGPNAMVDYSQ  
F69\_AAD04285 LVINDFYYPWNYFDARNIKNVEITNKLAFGPQGS PWGTAKLM-FNNLTLGPNAMVDYSQ  
F35\_AAD04264 LVINDFYYPWNYFDARNIKNVEITNKLAFGPQGS PWGTAKLM-FNNLTLGPNAMVDYSQ  
F52\_AAD04269 LVINDFYYPWNYFDARNIKNVEITNKLAFGPQGS PWGTAKLM-FNNLTLGPNAMVDYSQ  
F32\_BAD51774 LVINDFYYPWNYFDARNIKNVEITNKLAFGPQGS PWGTAKLM-FNNLTLGPNAMVDYSQ  
F80\_BAD51775 LVINDFYYPWNYFDARNIKNVEITNKLAFGPQGS PWGTAKLM-FNNLTLGPNAMVDYSQ  
F92\_BAD51776 LVINDFYYPWNYFDARNIKNVEITNKLAFGPQGS PWGTAKLM-FNNLTLGPNAMVDYSQ  
185-44\_CAA81528 LVINDFYYPWNYFDARNIKNVEITNKLAFGPQGS PWGTAKLM-FNNLTLGPNAMVDYSQ  
AFN4847\_AAK56859 LVINDFYYPWNYFDARNIKNVEITNKLAFGPQGS PWGTAKLM-FNNLTLGPNAMVDYSQ  
J99\_AAD06400 LVINDFYYPWNYFDARNIKNVEITNKLAFGPQGS PWGTAKLM-FNNLTLGPNAMVDYSQ  
AFN4124\_AAK56857 LVINDFYYPWNYFDARNIKNVEITNKLAFGPQGS PWGTAKLM-FNNLTLGPNAMVDYSQ  
AFN4769\_AAK56858 LVINDFYYPWNYFDARNIKNVEITNKLAFGPQGS PWGTAKLM-FNNLTLGPNAMVDYSQ  
AFNG114\_AAK56860 LVINDFYYPWNYFDARNIKNVEITNKLAFGPQGS PWGTAKLM-FNNLTLGPNAMVDYSQ  
AAB30582 LVINDFYYPWNYFDARNIKNVEITNKLAFGPQGS PWGTAKLM-FNNLTLGPNAMVDYSQ  
DSM.4867./CCUG.17874./NCTC.116 LVINDFYYPWNYFDARNIKNVEITNKLAFGPQGS PWGTAKLM-FNNLTLGPNAMVDYSQ  
NCTC.11638\_AAA18867 LVINDFYYPWNYFDARNIKNVEITNKLAFGPQGS PWGTAKLM-FNNLTLGPNAMVDYSQ  
HPAG1\_ABF84934 LVINDFYYPWNYFDARNIKNVEITNKLAFGPQGS PWGTAKLM-FNNLTLGPNAMVDYSQ  
P12\_ACJ08036 LVINDFYYPWNYFDARNIKNVEITNKLAFGPQGS PWGTAKLM-FNNLTLGPNAMVDYSQ











HPAG1\_ABF84934  
P12\_ACJ08036  
F79\_AAC77452  
26695\_AAD07935  
ATCC.700392./.26695\_P55981  
ATCC.43526\_AAB53868  
NCTC.11637\_AAD04290  
60190.(ATCC.49503)\_AAA17657  
ATCC.49503./.60190\_Q48245  
F37\_AAC77450  
G27\_ACI27595

R--NTDDIKACGMAIGNQSMVNNPDNYKYLIGKAWKNIGISKTANGSKI SVYYLGNSTPT  
R--NTDDIKACGTAIGNQSMVNNPDNYKYLIGKAWKNIGISKTANGSKI SVHYLGNSTPT  
R--NTDDIKACGMAIGNQSMVNNPDNYKYLIGKAWRNIGISKTANGSKI SVYYLGNSTPT  
R--NTDDIKACGTAIGNQSMVNNPDNYKYLIGKAWKNIGISKTANGSKI SVYYLGNSTPT  
R--NTDDIKACGTAIGNQSMVNNPDNYKYLIGKAWKNIGISKTANGSKI SVYYLGNSTPT  
R--NTDDIKACGTAIGNQSMVTTTPDNYKYLIGKAWKNIGISKTANGSKI SVYYLGNSTPT  
R--NTDDIKACGMAIGNQSMVNNPDNYKYLIGKAWKNIGISKTANGSKI SVYYLGNSTPT  
R--NTDDIKACGMAIGNQSMVNNPDNYKYLIGKAWKNIGISKTANGSKI SVYYLGNSTPT  
R--NTDDIKACGMAIGNQSMVNNPDNYKYLIGKAWKNIGISKTANGSKI SVYYLGNSTPT  
R--NTDDIKACGMAIGNQSMVNNPDNYKYLIGKAWRNIGISKTANGSKI SVYYLGNSTPT  
R--NTDDIKACGMAIGNQSMVNNPDNYKYLIGKAWRNIGISKTANGSKI SVYYLGNSTPT  
R--NTDDIKACGMAIGNQSMVNNPDNYKYLIGKAWKNIGISKTANGSKI SVYYLGNSTPT  
\* : \*:\*:\* \*\* : \*:\*.\*.\*:\* \*\* \*\*\*.\*\*\* : . : . : \* . \* : \* :

95-54.(J128)\_AAC25911

AFN1156\_AAK56856  
CHN3295b\_AAF26501  
CHN5114a\_AAF26509  
CHN1811a\_AAF26508  
CHN5147c\_AAF26502  
Tx30a\_AAA86834  
OK129\_BAD51782  
OK210\_BAD51798  
OK155\_BAD51786  
OK130\_BAD51783  
OK204\_BAD51796  
OK179\_BAD51790  
OK187\_BAD51794  
OK180\_BAD51791  
OK181\_BAD51792  
OK185\_BAD51793  
OK107\_BAD51778  
OK205\_BAD51797  
OK139\_BAD51784  
OK160\_BAD51789  
OK144\_BAD51785  
Shi470\_ACD48370  
V225  
ch2\_AAF86763  
OK109\_BAD51779  
F36\_AAD04277  
OK118\_BAD51781  
F44\_AAD04266  
F55\_AAD04270  
OK194\_BAD51795  
F70\_AAD04286  
F56\_AAD04271  
F78\_AAD04275  
98-10\_EEC22320  
F43\_AAD04280  
F71\_AAC77451  
F47\_AAD04268  
F17\_BAD51771  
F61\_AAD04281  
F68\_AAD04283  
F18\_BAD51772  
F26\_BAD51773  
OK158\_BAD51787  
CHN5038c\_AAL83505  
CHN3554a\_AAL83503  
CHN4611a\_AAL83504  
F73\_AAD04289  
F65\_AAD04272  
F45\_AAD04267  
F21\_AAD04261  
OK159\_BAD51788  
OK101\_BAD51777  
F72\_AAD04288

ENGGNTTDLPTNTTNA---RFASYALIKNAPFA-HYNATPNLVAINQHDFGTIESVFEL  
SSESNTTTLPTNTTNA---RFASYALIKNAPFA--HSATPNLVAINQHDFGTIESVFEL  
SSESNTTTLPTNATKNA---RFARYALIKNAPFA-HYSATPNLVAINKHDFGTIESVFEL  
SSESNTTTLPTNATKNA---RFARYALIKNAPFA-HYSATPNLVAINKHDFGTIESVFEL  
ENGGNTTTLPTNTTNNARFARFARYALIKNAPFA-HYSATPNLVAINKHDFGTIESVFEL  
ENGGNTTTLPTNTTNNARFARFARYALIKNAPFA-HYSATPNLVAINKHDFGTIESVFEL  
NSTTDTTLPTNTTNA---RFASYALIKNAPFA--HSATPNLVAINQHDFGTIESVFEL  
ENGGNTTTLPTNTTNA---RFARYALIKNAPFA-RYSATPNLVAINKHDFGTIESVFEL  
ENGGNTTTLPTNTTNA---RFARYALIKNAPFA-RYSATPNLVAINQHDFGTIESVFEL  
ENGGNTTTLPTNTTNA---RFASYALIKNAPFA-RYSATPNLVAINQHDFGTIESVFEL  
ENGGNTTTLPTNATKNA---RFARYALIKNAPFA-QTSTTPNLVAINKHDFGTIESVFEL  
ENGGNTTTLPTNTTNA---RFASYALIKNAPFA-RYSATPNLVAINQHDFGTIESVFEL  
SSESNTTTLPTNTTNA---RFASYALIKNAPFA-RYSATPNLVAINKHDFGTIESVFEL  
ENGGNTTTLPTNTTNA---RFASYALIKNAPFA-RYSATPNLVAINQHDFGTIESVFEL  
ENGGNTTTLPTNTTNA---RFASYALIKNAPFA-RYSATPNLVAINQHDFGTIESVFEL  
ENGGNTTTLPTNTTNA---RFASYALIKNAPFA-RYSATPNLVAINQHDFGTIESVFEL  
ENGGNTTTLPTNTTNA---RFASYALIKNAPFA-RYSATPNLVAINQHDFGTIESVFEL  
ENGGNTTTLPTNTTNA---RFVSYALIKNAPFA-RYSTTPNLVAINQHDFGTIESVFEL  
ENGGNTTTLPTNTTNA---RFASYALIKNAPFA-RYSATPNLVAINQHDFGTIESVFEL  
ENGGNTTTLPTNTTNA---RFVSYALIKNAPFA-RYSATPNLVAINQHDFGTIESVFEL  
ENGGNTTTLPTNTTNA---RFVSYALIKNAPFA-RYSATPNLVAINQHDFGTIESVFEL  
ENSGNTTTLPTNTTNA---RFASYALIKNAPFA-QASATPNLVAINKHDFGTIESVFEL  
D----PTDLPKNAEDSAK--KPLNNALLARSIFY--STSATPNLVAINKHDFGTIESVFEL  
SSESNTTTLPTNTTNA---RFARYALIRNAPFA-HYSATPNLVAINKHDFGTIESVFEL  
D----PTDLPKNAENSAE--KPLNNALLARSIFY--QTSATPNLVAINKHDFGTIESVFEL  
D----PTDLPKNAENSTE--KPLNNALLARSIFY--QTSATPNLVAINKHDFGTIESVFEL  
DNGGNTTTLPTNTTNA---RFARYALIKNAPFA-QASATPNLVAINKHDFGTIESVFEL  
ENGGNTTTLPTNTTNA---RFASYALIKNAPFA-QTSATPNLVAINKHDFGTIESVFEL  
ENGGNTTTLPTNTTNA---RFARYALIKNAPFA-QTNATPNLVAINKHDFGTIESVFEL  
ENGGNTTTLPTNTTNA---RFARYALIKNAPFA-QTNATPNLVAINKHDFGTIESVFEL  
DNGGNTTTLPTNTTNA---RFARYALIKNAPFA-QTSATPNLVAINKHDFGTIESVFEL  
ENGGNTTTLPTNTTNA---RFARYALIKNAPFA-QTSATPNLVAINKHDFGTIESVFEL  
DNGGNTTTLPTNTTNA---RFARYALIKNAPFA-QTNATPNLVAINKHDFGTIESVFEL



F70\_AAD04286  
F56\_AAD04271  
F78\_AAD04275  
98-10\_EEC22320  
F43\_AAD04280  
F71\_AAC77451  
F47\_AAD04268  
F17\_BAD51771  
F61\_AAD04281  
F68\_AAD04283  
F18\_BAD51772  
F26\_BAD51773  
OK158\_BAD51787  
CHN5038c\_AAL83505  
CHN3554a\_AAL83503  
CHN4611a\_AAL83504  
F73\_AAD04289  
F65\_AAD04272  
F45\_AAD04267  
F21\_AAD04261  
OK159\_BAD51788  
OK101\_BAD51777  
F72\_AAD04288  
F16\_BAD51770  
CHN5060d\_AAF26510  
F15\_BAD51769  
F33\_AAD04276  
F38\_AAD04279  
F42\_AAD04265  
F13\_BAD51768  
F64\_AAD04282  
F69\_AAD04285  
F35\_AAD04264  
F52\_AAD04269  
F32\_BAD51774  
F80\_BAD51775  
F92\_BAD51776  
185-44\_CAA81528  
AFN4847\_AAK56859  
J99\_AAD06400  
AFN4124\_AAK56857  
AFN4769\_AAK56858  
AFNG114\_AAK56860  
AAB30582  
DSM.4867./CCUG.17874./NCTC.116  
NCTC.11638\_AAA18867  
HPAG1\_ABF84934  
P12\_ACJ08036  
F79\_AAC77452  
26695\_AAD07935  
ATCC.700392./26695\_P55981  
ATCC.43526\_AAB53868  
NCTC.11637\_AAD04290  
60190.(ATCC.49503)\_AAA17657  
ATCC.49503./60190\_Q48245  
F37\_AAC77450  
G27\_ACI27595

ANRSKDIDTLYANSGVQGRDLLQTLIDSHDAGYARTMIDATSANEITKQNTATDALNN  
ANRSEDIDTLYAHSGAKGRDLLQTLIDSHNAGYARTMIDATSANEITKQNTATDALNN  
ANRSEDIDTLHANSQAQGRDLLQTLIDSHDAGYARTMIDATSANEITKQNEANSALNN  
ANRSDIDTLYANSGAQRDLLQTLIDSHNAGYARTMIDATSANEITKQNTATDALNN  
ANRSKDIDTLYAHSGAQRDLLQTLIDSHDAGYARTMIDATSTNEITKQNEANSALNN  
ANRSEDIDTLYANSGAQRDLLQTLIDSHDAGYARTMIDATSTNEITKQNEANSALNN  
ANRSEDIDTLYANSGAQRDLLQTLIDSHDAGYARTMIDATSTNEITKQNEANSALNN  
ANRSEDIDTLYANSGAQRDLLQTLIDSHDAGYARTMIDATSTNEITKQNEANSALNN  
ANRSEDIDTLYANSGAQRDLLQTLIDSHNAGYARTMIDATSANEITKQNEANSALNN  
ANRSKDIDTLYAHSGAQRDLLQTLIDSHNAGYARTMIDATSANEITKQNTATDALNN  
ANRSKDIDTLYANSGVQGRDLLQTLIDSHDAGYARTMIDATSANEITKQNTATDALNN  
ANRSKDIDTLYANSGVQGRDLLQTLIDSHDAGYARTMIDATSANEITKQNTATDALNN  
ANRSKDIDTLYAHSGAQRDLLQTLIDSHNAGYARTMIDATSANEITKQNTATDALNN  
ANRSEDIDTLYAHSGAQRDLLQTLIDSHNAGYARTMIDATSANEITKQNTATDALNN  
ANRSKDIDTLYANSGAQRDLLQTLIDSHNAGYARTMIDATSANEITKQNTATDALNN  
ANRSKDIDTLYAHSGAQRDLLQTLIDSHNAGYARTMIDATSANEITKQNTATDALNN  
ANRSKDIDTLYAHSGVQGRDLLQTLIDSHNAGYARTMIDATSANEITKQNTATDALNN  
ANRSKDIDTLYAHSGVQGRDLLQTLIDSHNAGYARTMIDATSANEITKQNTATDALNN  
ANRSDIDTLYAHSGTQGRDLLQTLIDSHNAGYARTMIDATSANEITKQNTATDALNN  
ANRSKDIDTLYAHSGVQGRDLLQTLIDSHNAGYARTMIDATSANEITKQNTATDALNN  
ANRSKDIDTLYAHSGVQGRDLLQTLIDSHNAGYARTMIDATSANEITKQNTATDALNN  
ANRSKDIDTLYAHSGAQRDLLQTLIDSHNAGYARTMIDATSANEITKQNEANSALNN  
ANRSKDIDTLYAHSGAQRDLLQTLIDSHDAGYARTMIDATSANEITKQNTATDALNN  
ANRSKDIDTLYAHSGAQRDLLQTLIDSHDAGYARTMIDATSANEITKQNTATDALNN  
ANRSKDIDTLYAHSGAQRDLLQTLIDSHDAGYARTMIDATSANEITKQNTATDALNN  
ANRSKDIDTLYAHSGAQRDLLQTLIDSHDAGYARTMIDATSANEITKQNTATDALNN  
ANRSKDIDTLYAHSGAQRDLLQTLIDSHDAGYARTMIDATSANEITKQNTATDALNN  
ANRSKDIDTLYAHSGAQRDLLQTLIDSHNAGYARTMIDATSANEITKQNTATDALNN  
ANRSKDIDTLYAHSGAQRDLLQTLIDSHNAGYARTMIDATSANEITKQNTATDALNN  
ANRSKDIDTLYTHSGAKGRDLLQTLIDSHDAGYARQMIDNTSTGEITKQNAATTTLNN  
ANRSKDIDTLYTHSGAKGRDLLQTLIDSHDAGYARQMIDNTSTGEITKQNAATTTLNN  
ANRSNDIDTLYANSGAQRDLLQTLIDSHDAGYARTMIDATSANEITKQNTATTTLNN  
ADRSKDIDTLYTHSGAQRDLLQTLIDSHDAGYARTMIDATNTGEITQSLNAATDALNN  
ANRSKDIDTLYTHSGAQRDLLQTLIDSHDAGYARQMIDNTSTGEITKQNAATDALNN  
ANRSKDIDTLYTHSGAQRDLLQTLIDSHDAGYARQMIDNTSTGEITKQNAATDALNN  
ANRSKDIDTLYTHSGAQRDLLQTLIDSHDAGYARQMIDNTSTGEITKQNAATDALNN  
ANRSKDIDTLYTHSGAQRDLLQTLIDSHDAGYARQMIDNTSTGEITKQNAATDALNN  
ANRSKDIDTLYTHSGAQRDLLQTLIDSHDAGYARQMIDNTSTGEITKQNAATDALNN  
ANRSKDIDTLYTHSGAQRDLLQTLIDSHDAGYARQMIDNTSTGEITKQNAATDALNN  
ANRSKDIDTLYANSGAQRDLLQTLIDSHDAGYARQMIDATSANEITKQNTATTTLNN  
ANRSKDIDTLYANSGAQRDLLQTLIDSHDAGYARQMIDATSANEITKQNTATTTLNN  
ANRSKDIDTLYANSGAQRDLLQTLIDSHDAGYARQMIDATSANEITKQNTATTTLNN  
ANRSDIDTLYTHSGAQRDLLQTLIDSHDAGYARQMIDNTSTGEITKQNTATTTLNN  
ANRSKDIDTLYTHSGAQRNLLQTLIDSHDAGYARQMIDNTSTGEITKQNAATTTLNN  
ANRSKDIDTLYTHSGAQRDLLQTLIDSHDAGYARQMIDNTSTGEITKQNAATDALNN  
ANRSKDIDTLYANSGAQRDLLQTLIDSHDAGYARQMIDNTSTGEITKQNAATTTLNN  
ANRSKDIDTLYTHSGAKGRDLLQTLIDSHDAGYVQRMIDNTSTGEITKQNAATTTLNN  
ANRSKDIDTLYTHSGAKGRDLLQTLIDSHDAGYARQMIDNTSTGEITKQNAATTTLNN  
ANRSKDIDTLYANSGAQRDLLQTLIDSHDAGYARTMIDATSANEITKQNTATTTLNN  
ANRSKDIDTLYANSGAQRDLLQTLIDSHDAGYARTMIDATSANEITKQNTATTTLNN  
ANRSKDIDTLYTHSGAQRDLLQTLIDSHDAGYARQMIDNTSTGEITKQNAATDALNN  
ANRSKDIDTLYTHSGVQGRDLLQTLIDSHDAGYARQMIDNTSTGEITKQNAATDALNN  
ANRSKDIDTLYTHSGVQGRDLLQTLIDSHDAGYARQMIDNTSTGEITKQNAATDALNN  
\*:\*:\*:\*:\* \*:\*:\*:\*:\*:\*:\*:\*:\*:\*:\*:\*:\*:\*:\*:\*:\*:\*:\*:\*:\*:\*:\*

95-54.(J128)\_AAC25911  
AFN1156\_AAK56856  
CHN3295b\_AAF26501  
CHN5114a\_AAF26509  
CHN1811a\_AAF26508  
CHN5147c\_AAF26502  
Tx30a\_AAA86834  
OK129\_BAD51782

IASLDHKTSGLQTLISLSNAMILNSRLVNLRRHTNNIDSFARKLQALKQRFASLESAAE  
VASLEHKTSGLQTLISLSNAMILNSRLVNLRRHTNHINSFAQRLQALKQRFASLESAAE  
IASLEHKTSGLQTLISLSNAMILNSRLVNLRRHTNNIDSFARRLQALKDQRFASLESAAE  
IASLEHKTSGLQTLISLSNAMILNSRLVNLRRHTNNIDSFARKLQALKDQRFASLESAAE  
IASLEHKTSGLQTLISLSNAMILNSRLVNLRRHTNNIDSFQRLQALKDQRFASLESAAE  
IASLEHKTSGLQTLISLSNAMILNSRLVNLRRHTNNIDSFQRLQALKDQRFASLESAAQ  
IASLEHKTSGLQTLISLSNAMILNSRLVNLRRHTNHIDSFARKLQALKDQRFASLESAAE  
IASLEHKTSGLQTLISLSNAMILNSRLVNLRRHTNNIDSFQRLQALKQRFASLESAAE
