# Supplementary material
Source: PubMed Central journal article supplement (PMC2901691)

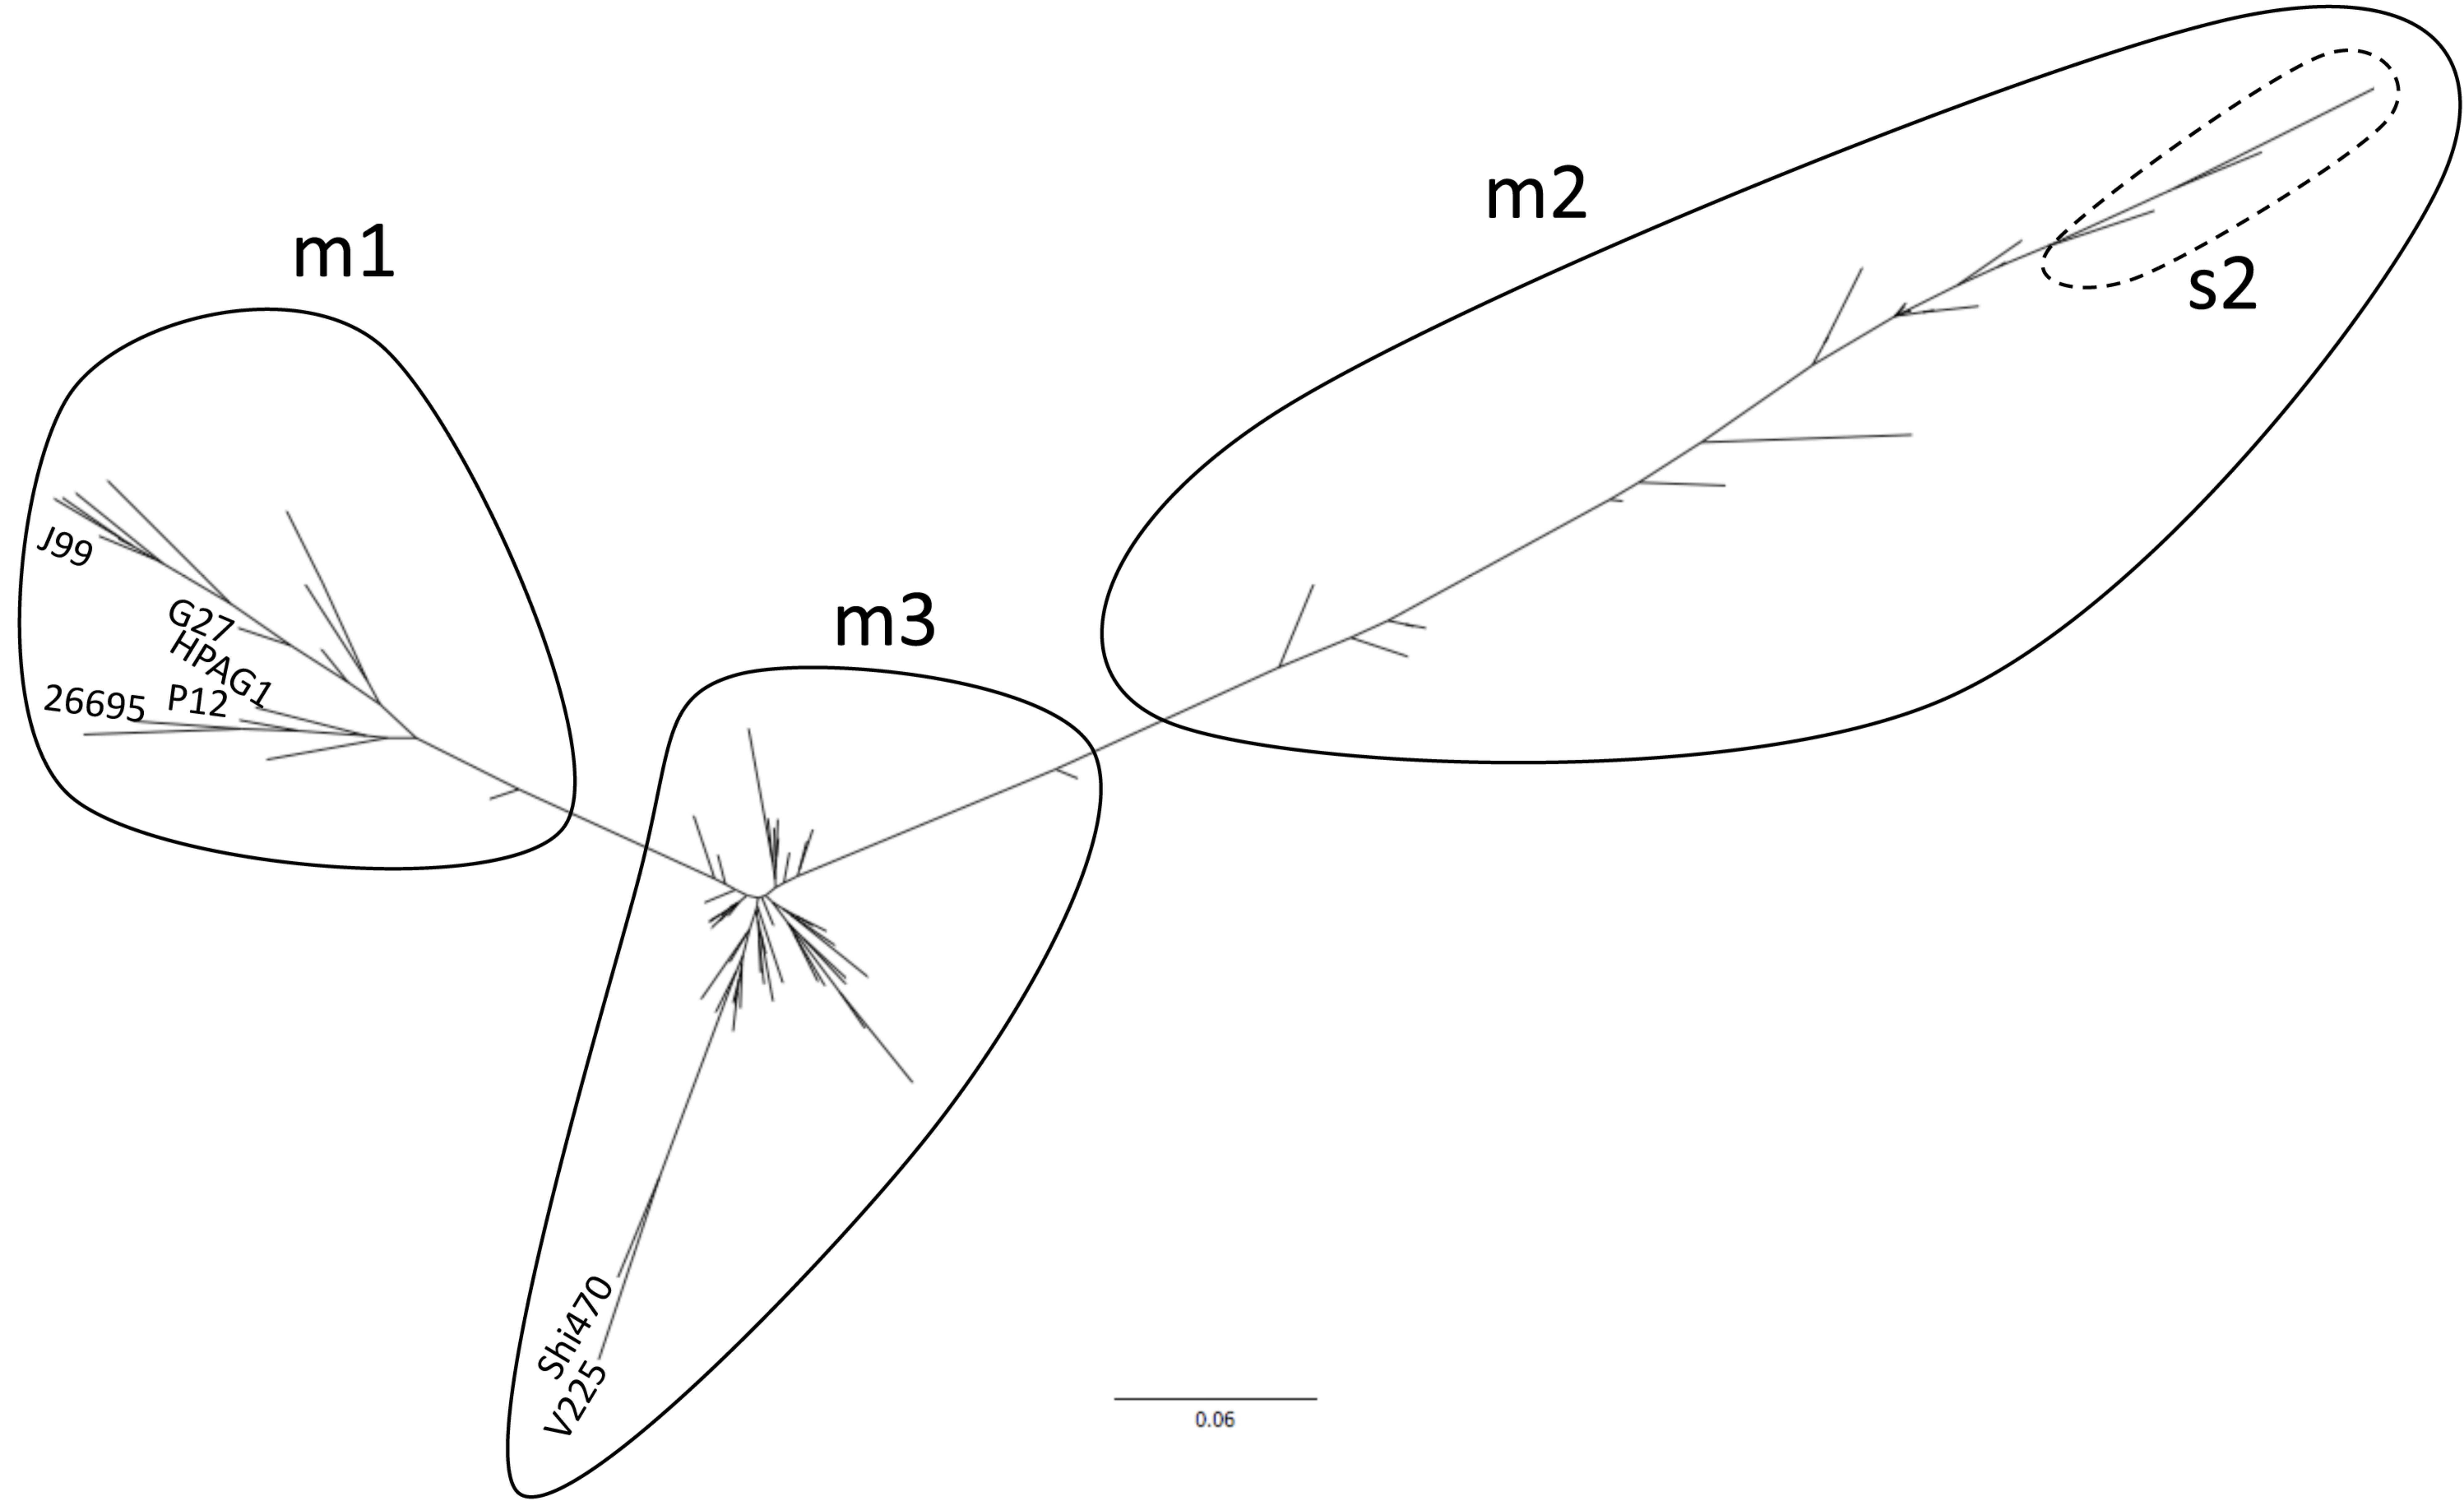

m1

m2

s2

m3

J99

G27

HPAG1

26695

P12

Shi470  
V225

0.06

Supplement: supp_192_12_3078__3.pdf [file supp_192_12_3078__3.pdf]
